# Supplementary material for: Age-related and individual features of the HPA axis stress responsiveness under constant light in nonhuman primates
Source: Front Endocrinol (Lausanne). 2023 Jan 9;13:1051882. doi: 10.3389/fendo.2022.1051882 (PMC9870316; doi:10.3389/fendo.2022.1051882)
Supplement: Supplementary file 1 [file Table_1.xls]

## Sheet: Stress
FIGURE 1A
ACTH, pg/ml (acute stress) Basal period (BP)
YOUNG
Time (min)		0'	15'	30'	60'	120'	240'
41818		23	100	180	74	25	6.5
40757		18	115	90	30	34	6.5
40775		13	50	62	54	56	3
40743		35	68	68	170	140	10
40102		35	130	74	190	140	60
41007		66	150	50	100	94	30
40176		32	40	90	70	105	10
38787		90	120	56	84	75	6.4
Mean		39	96.625	83.75	96.5	83.625	16.55
σ		26.1425	39.7454	41.5202	55.7418	44.1715	19.4321
S.E.M. (n=8)		9.24276	14.0521	14.6796	19.7077	15.617	6.87028
Ttest Tukey vs 0 min	р=		0.0042	0.066	0.025	0.028	0.0755
			##		#	#
FIGURE 1A
ACTH, pg/ml (acute stress) Constant light (CL)
YOUNG
Time (min)		0'	15'	30'	60'	120'	240'
41818		12	54	66	60	7	6
40757		2	20	30	45	33	6
40775		2	11	22	12	34	4
40743		8.4	45	58	82	40	17
40102		2	8	33	60	20	20
41007		12	56	68	105	60	7
40176		25	34	38	145	56	10
38787		70	80	66	94	94	6
Mean		16.675	38.5	47.625	75.375	43	9.5
σ		22.9008	24.9571	18.7916	40.5813	26.9232	5.8554
S.E.M. (n=8)		8.09664	8.82367	6.64384	14.3476	9.51878	3.38062
Ttest Tukey vs 0 min	р=		0.00674766	0.00452819	0.00246525	0.00179331
			##	##	##	##
Ttest vs BEFORE	р=	0.0907006	0.00351394	0.0416803	0.400776	0.0433372
			●●	●		●

## Sheet: CRH
Figure 1C									Figure 1C
ACTH, pg/ml (CRH test), animals with DAB, basal period									ACTH, pg/ml (CRH test), animals with SB, basal period
YOUNG		BASAL PERIOD							YOUNG		BASAL PERIOD
Time (min)	0'	15'	30'	60'	120'	240'			Time (min)	0'	15'	30'	60'	120'	240'
40102	12	18	78	170	48	6			41818	9	19	40	47	23	3
40743	43	45	105	160	72	3			40757	4	14	33	30	9	4
40176	23	15	90	66	29	3			40775	18	24	25	78	14	4
Mean	26	26	91	132	49.6667	4			Mean	10.3333	19	32.6667	51.6667	15.3333	3.66667
σ	15.7162	16.5227	13.5277	57.376	21.5484	1.73205			σ	7.0946	5	7.50555	24.3379	7.0946	0.57735
S.E.M. (n=3)	9.07377	9.53939	7.81025	33.126	12.441	1			S.E.M. (n=3)	4.09607	2.88675	4.33333	14.0515	4.09607	0.333333
Т-тест,Tukey vs 0		1	0.000551811	0.0877198	0.120638	0.15551			Т-тест,Tukey vs 0		0.0228602	0.100894	0.0534075	0.437456	0.241902
			###								#
Figure 1C									Figure 1C
ACTH, pg/ml (CRH test), animals with DAB, constant light									ACTH, pg/ml (CRH test), animals with SB, constant light
YOUNG									YOUNG
Time (min)	0'	15'	30'	60'	120'	240'			Time (min)	0'	15'	30'	60'	120'	240'
40102	14	18	56	130	270	43			41818	33	23	12	30	23	12
40743	80	155	210	235	240	12			40757	11	9	30	16	16	6.5
40176	80	82	170	220	145	21			40775	14	11	64	86	35	4
Mean	58	85	145.333	195	218.333	25.3333			Mean	19.3333	14.3333	35.3333	44	24.6667	7.5
σ	38.1051	68.5493	79.9083	56.7891	65.2559	15.9478			σ	11.9304	7.57188	26.4071	37.0405	9.60902	4.09268
S.E.M. (n=3)	22	39.5769	46.1351	32.7872	37.6755	9.20748			S.E.M. (n=3)	6.88799	4.37163	15.2461	21.3854	5.54777	2.36291
Т-тест,Tukey vs 0		0.377567	0.075376	0.00680298	0.100711	0.401794			Т-тест,Tukey vs 0		0.185312	0.517728	0.408549	0.611715	0.134854
				##
Ttest vs BASAL PERIOD	0.168925	0.143783	0.223842	0.167107	0.00383127	0.040162			Ttest vs BASAL PERIOD	0.324262	0.423376	0.874556	0.779397	0.247346	0.183463
					●●	●

## Sheet: AVP
Figure 1E
ACTH, pg/ml (AVP test), basal period
Young
	0'	15'	30'	60'	120'	240'
39032	72	120	120	170	230	30
40151	100	205	280	240	200	60
40176	87	195	200	230	145	35
38787	130	130	220	220	260	70
1112	97	163	206	215	207	49
Mean	97.2	162.6	205.2	215	208.4	48.8
σ	21.3471	37.8325	57.2294	26.9258	42.4888	16.7242
S.E.M. (n=5)	9.54673	16.9192	25.5937	12.0416	19.0016	7.4793
Т-тест,Tukey vs 0		0.00999	0.0043	0.0003	0.00096	0.004
		##	##	###	###	##
Figure 1E
ACTH, pg/ml (AVP test), constant light
Young
	0'	15'	30'	60'	120'	240'
39032	11	76	84	180	40	8
40151	62	125	190	220	160	26
40176	20	20	84	105	145	9
38787	11	78	115	135	180	9
1112	26	74	115	165	135	15
Mean	26	74.6	117.6	161	132	13.4
σ	21.1069	37.1995	43.3394	43.7893	54.1526	7.56968
S.E.M. (n=5)	9.43928	16.6361	19.382	19.5832	24.2178	3.38526
Т-тест,Tukey vs 0		0.035	0.0029	0.0004	0.0037	0.244
		#	##	###	##
Ttest vs BASAL PERIOD	0.00627995	0.0286264	0.0812024	0.113016	0.0989379	0.0149108
	●●	●				●
