# Supplementary material for: Age-related and individual features of the HPA axis stress responsiveness under constant light in nonhuman primates
Source: Front Endocrinol (Lausanne). 2023 Jan 9;13:1051882. doi: 10.3389/fendo.2022.1051882 (PMC9870316; doi:10.3389/fendo.2022.1051882)
Supplement: Supplementary file 2 [file Table_2.xls]

## Sheet: Stress
Figure 1B
Cortisol, nmol/l (acute stress), basal period (BP)
YOUNG
Time (min)		0'	30'	60'	120'	240'
41818		780	960	959	1100	780
40757		430	960	961	960	640
40775		390	780	960	960	600
40743		490	780	960	960	960
40102		640	780	1000	960	960
41007		780	960	960	1100	900
40176		640	780	960	960	900
38787		780	960	960	960	780
Mean		616.25	870	965	995	815
σ		161.859	96.214	14.1522	64.8074	139.284
S.E.M. (n=8)		57.2257	34.0168	5.00357	22.9129	49.2443
Ttest Tukey vs 0 min	р=		0.00139255	0.000495488	8.12505e-05	0.00959336
			##	###	###	##
Figure 1B
Cortisol, nmol/l (acute stress), constant light (CL)
YOUNG
Time (min)		0'	30'	60'	120'	240'
41818		700	800	1050	1050	640
40757		125	600	720	600	380
40775		190	640	540	600	390
40743		185	800	960	1100	240
40102		270	720	960	960	720
41007		540	800	960	1050	700
40176		540	780	960	1050	800
38787		640	720	780	800	640
Mean		398.75	732.5	866.25	901.25	563.75
σ		229.794	77.7817	170.791	207.395	199.71
S.E.M. (n=8)		81.2445	27.5	60.3838	73.325	115.302
Ttest Tukey vs 0 min	р=		0.00174443	0.000370632	0.000400838	0.0251863
			##	###	###	#
Ttest vs BP	р=	0.0460674	0.00718518	0.125432	0.242486	0.0112206
		●	●●			●

## Sheet: CRH
Figure 1D
Cortisol, nmol/l (CRH test), basal period
YOUNG
Time (min)		0'	15'	30'	60'	120'	240'
41818		465	800	800	1050	800	560
40102		505	800	800	860	1200	860
40757		325	800	800	860	700	360
40775		450	620	620	700	680	400
40743		400	700	600	840	900	400
40176		430	940	1000	940	840	500
Mean		429.167	776.667	770	875	853.333	513.333
σ		61.9206	108.382	146.287	115.888	189.174	185.329
S.E.M. (n=6)		25.279	44.2468	59.7216	47.311	77.2298	75.6601
Ttest Tukey vs 0 min	р=		0.00107785	0.0030594	0.00032493	0.00127795	0.206921
			##	##	###	##
Figure 1D
Cortisol, nmol/l (CRH test), constant light
YOUNG
Time (min)		0'	15'	30'	60'	120'	240'
41818		560	720	900	900	840	600
40102		480	640	860	1000	1000	720
40757		450	600	610	840	540	380
40775		470	510	700	840	680	400
40743		410	500	620	780	860	660
40176		640	680	860	1000	1100	780
Mean		501.667	608.333	758.333	893.333	836.667	590
σ		83.7655	89.5358	130.601	90.9212	204.516	166.253
S.E.M. (n=6)		34.1971	36.5529	53.3177	37.1184	83.4932	67.8724
Ttest Tukey vs 0 min	р=		0.00630335	0.000692919	2.56851e-05	0.00457874	0.194346
			##	##	###	##
Ttest vs BEFORE	р=	0.396	0.0149631	0.887	0.767	0.886	0.345
			●

## Sheet: AVP
Figure 1F
Cortisol, nmol/l (AVP test), basal period
Young
Time(min)	0'	15'	30'	60'	120'	240'
39032	640	840	1000	1100	1100	1100
40151	840	1000	1100	1100	1200	1100
40176	840	840	1000	1100	1100	900
38787	740	740	800	1000	1200	1000
40775	720	1000	1000	1100	1100	800
Mean	756	884	980	1080	1140	980
σ	85.3229	113.49	109.545	44.7214	54.7723	130.384
S.E.M. (n=5)	38.1576	50.7543	48.9898	20	24.4949	58.3095
Ttest,Tukey vs 0		0.0831706	0.0125057	0.00141071	0.000491493	0.0370022
			#	##	###	#
Figure 1F
Cortisol, nmol/l (AVP test), constant light
Young
Time(min)	0'	15'	30'	60'	120'	240'
39032	600	840	920	960	1000	920
40151	840	940	960	1000	1050	960
40176	500	720	840	960	980	840
38787	720	760	840	940	960	920
40775	700	840	920	960	1000	840
Mean	672	820	896	964	998	896
σ	128.53	84.8528	53.6656	21.9089	33.4664	53.6656
S.E.M. (n=5)	57.4804	37.9473	24	9.79796	14.9666	24
Тtest,Tukey vs 0		0.0164249	0.00891551	0.00534641	0.00293404	0.00781618
		#	##	##	##	##
Ttest vs BASAL PERIOD	0.258098	0.342104	0.162175	0.00098	0.00112539	0.219507
				●●●	●●
