# Supplementary material for: Age-related and individual features of the HPA axis stress responsiveness under constant light in nonhuman primates
Source: Front Endocrinol (Lausanne). 2023 Jan 9;13:1051882. doi: 10.3389/fendo.2022.1051882 (PMC9870316; doi:10.3389/fendo.2022.1051882)
Supplement: Supplementary file 3 [file Table_3.xls]

## Sheet: ACTH
Figure 2A					Figure 2A					Figure 2A					Figure 2A
S240 ACTH (pg/ml×min) STRESS (ASE)					S240 ACTH (pg/ml×min), CRH, young animals with DAB					S240 ACTH (pg/ml×min),CRH, young animals with SB					S240 ACTH (pg/ml×min), test with AVP
YOUNG		Basal period	Constant light		YOUNG DAB		Basal period	Constant light		YOUNG SB		Basal period	Constant light		YOUNG		Basal period	Constant light
41818		18900	9408		40102		15504	24120		41818		6480	5304		39032		33168	18696
40757		13500	6336		40743		19440	42528		40757		4320	3828		40151		48240	35472
40775		11040	3936		40176		10224	32040		40775		7296	9840		40176		39888	17688
40743		22488	11409.6		Mean		15056	32896		Mean		6032	6324		38787		44640	24864
40102		27912	6336		σ		4624.3	9233.81		σ		1537.75	3133.1		Mean		41484	24180
41007		21216	14328		S.E.M. (n=3)		2669.84	5331.14		S.E.M. (n=3)		887.82	1808.9		σ		6514.26	8169
40176		15648	13944		Ttest Tukey, vs Basal period	р=		0.016		Ttest Tukey, vs Basal period	р=		0.892		S.E.M. (n=4)		3257.13	4084.5
38787		18393.6	17856												Ttest Tukey, vs Basal period	р=		0.0161586
Mean		18637.2	10444.2					●					●
σ		5354.21	4786.65							Ttest Tukey vs DAB	p=	0.0326731	0.00917163					●
S.E.M. (n=8)		1893	1692.34									*	**
Ttest Tukey, vs Basal period	р=		0.00608933
			●●

## Sheet: CORT
Figure 2B					Figure 2B					Figure 2B
S240 CORTISOL (nmol/l×min) STRESS (ASE)					S240 CORTISOL (nmol/l×min), test with CRH					S240 CORTISOL (nmol/l×min), test with AVP
YOUNG		Basal period	Constant light		YOUNG		Basal period	Constant light		YOUNG		Basal period	Constant light
41818		227940	214200		41818		190200	189120		39032		235680	215040
40757		204960	130350		40102		208440	196800		40151		257760	232800
40775		191700	124200		40757		168120	144240		40176		235680	200160
40743		205500	184350		40775		146160	151920		38787		221280	207360
40102		212400	188100		40743		165120	158160		40775		238080	215520
41007		231600	205800		40176		200880	208800		Mean		237696	214176
40176		208200	207600		Mean		179820	174840		σ		13041.5	12168.7
38787		219600	176400		σ		23901.2	26755.7		S.E.M. (n=5)		5832.35	5442.02
Mean		212738	178875		S.E.M. (n=6)		9757.64	10923		Ttest Tukey, vs Basal period	р=		0.018
σ		13148.4	34357.7		Ttest Tukey, vs Basal period	р=		0.740883
S.E.M. (n=8)		4648.64	12147.3										●
Ttest Tukey, vs Basal period	р=		0.0208339
			●
