# Supplementary material for: Age-related and individual features of the HPA axis stress responsiveness under constant light in nonhuman primates
Source: Front Endocrinol (Lausanne). 2023 Jan 9;13:1051882. doi: 10.3389/fendo.2022.1051882 (PMC9870316; doi:10.3389/fendo.2022.1051882)
Supplement: Supplementary file 4 [file Table_4.xls]

## Sheet: ACTH
Figure 2C					Figure 2C					Figure 2C
S240 ACTH (pg/ml×min) STRESS (ASE), control					S240 ACTH (pg/ml×min), test with CRH, control					S240 ACTH (pg/ml×min), test with AVP, control
YOUNG		Basal period	Standard light		YOUNG		Basal period	Standard light		YOUNG		Basal period	Standard light
41818		7920	7224		43043		13680	9624		41007		20736	16032
40102		26760	14808		42259		4560	10248		39444		19272	19272
40757		5232	4536		42234		4152	7872		40743		21072	21072
40775		24792	26568		43130		4152	7104		40102		18312	18312
40743		17352	41385.6		41512		10968	10368		11111		19728	17832
40176		10248	11376		Mean		7502.4	9043.2		Mean		19824	18504
Mean		15384	17649.6		σ		4507.8	1472.77		σ		1116.84	1856.32
σ		9021.64	13935.8		S.E.M. (n=5)		2015.95	658.642		S.E.M. (n=5)		499.465	830.171
S.E.M. (n=6)		3683.07	5689.25		Ttest Tukey, vs Basal period	р=		0.488		Ttest Tukey, vs Basal period	р=		0.210171
Ttest Tukey, vs Basal period	р=		0.745

## Sheet: CORT
Figure 2D					Figure 2D					Figure 2D
S240 CORT (nmol/l×min), STRESS (ASE), control					S240 CORT (nmol/l×min),test with CRH, control					S240 CORT (nmol/l×min), test with AVP, control
YOUNG		Basal period	Standard light		YOUNG		Basal period	Standard light		YOUNG		Basal period	Standard light
41818		199320	192480		43043		188880	217440		40743		215520	219360
40102		199200	213600		42259		204960	176640		40102		219840	227520
40757		188160	156480		41512		196320	202320		41007		224640	216000
40775		189600	164400		43130		199800	215280		39444		221760	226560
40743		193920	161040		42234		128880	156240		Mean		220440	222360
40176		229920	185760		Mean		183768	193584		σ		3827.48	5589.13
Mean		200020	178960		σ		31235	26447.2		S.E.M. (n=4)		1913.74	2794.57
σ		15372.8	22214.5		S.E.M. (n=5)		13968.7	11827.5		Ttest Tukey, vs Basal period	р=		0.591363
S.E.M. (n=6)		6275.93	9069.05		Ttest Tukey, vs Basal period	р=		0.606343
Ttest Tukey, vs Basal period	р=		0.085
