# Supplementary material for: Age-related and individual features of the HPA axis stress responsiveness under constant light in nonhuman primates
Source: Front Endocrinol (Lausanne). 2023 Jan 9;13:1051882. doi: 10.3389/fendo.2022.1051882 (PMC9870316; doi:10.3389/fendo.2022.1051882)
Supplement: Supplementary file 5 [file Table_5.xlsx]

## Sheet: ACTH
Figure 3A									Figure 3C									Figure 3E
ACTH (pg/ml), Stress, control, basal period									ACTH (pg/ml), test with CRH, control, basal period									ACTH (pg/ml), test with AVP, control, basal period
YOUNG									YOUNG									YOUNG
TIME(MIN)		0'	15'	30'	60'	120'	240'		TIME(MIN)		0'	15'	30'	60'	120'	240'		TIME(MIN)		0'	15'	30'	60'	120'	240'
41818		11	22	39	40	56	5		43043		17	70	64	84	52	13		41007		84	115	150	120	90	10
40102		12	120	48	190	185	17		42259		12	13	37	15	17	14		39444		75	137	110	110	90	14
40757		15	47	16	16	18	9		42234		14	26	12	22	13	13		40743		52	100	82	210	210	42
40775		24	125	58	150	160	23		43130		14	26	12	22	13	13		40102		17	84	83	195	160	22
40743		10	110	44	68	130	9		41512		23	45	70	64	29	18		11111		58	110	100	160	130	24
40176		33	47	68	46	34	4		Mean		16	36	39	41.4	24.8	14.2		Mean		57.2	109.2	105	159	136	22.4
Mean		17.5	78.5	45.5	85	97.1667	11.1667		σ		4.30116	22.1698	27.6043	30.7213	16.559	2.16795		σ		25.8786	19.5371	27.7849	44.2154	50.7937	12.3612
σ		9.13783	44.8408	17.7961	69.0594	70.2749	7.38693		S.E.M. (n=5)		1.92354	9.91464	12.345	13.739	7.4054	0.969536		S.E.M. (n=5)		11.5732	8.73728	12.4258	19.7737	22.7156	5.52811
S.E.M. (n=6)		3.7305	18.3062	7.26521	28.1934	28.6896	3.0157		Ttest Tukey, vs 0	р=		0.0877663	0.104007	0.110141	0.25998	0.220537		Ttest Tukey, vs 0	р=		0.00758659	0.0148595	0.0773169	0.141488	0.16578
Ttest Tukey, vs 0	р=		0.0239111	0.00385798	0.0649666	0.0445365	0.246602														##	#
			#	##		#
Figure 3A									Figure 3C									Figure 3E
ACTH (pg/ml), Stress, control, standard light									ACTH (pg/ml), test with CRH, control, constant light									ACTH (pg/ml), test with AVP, control, constant light
YOUNG									YOUNG									YOUNG
TIME(MIN)		0'	15'	30'	60'	120'	240'		TIME(MIN)		0'	15'	30'	60'	120'	240'		TIME(MIN)		0'	15'	30'	60'	120'	240'
41818		19	35	40	42	16	16		43043		22	30	17	84	52	13		41007		70	83	56	140	140	40
40102		26	38	30	130	90	15		42259		9	52	44	64	47	4		39444		38	120	125	125	83	25
40757		5	15	32	32	12	2		42234		40	25	43	22	47	14		40743		52	100	82	210	210	42
40775		16	100	27	190	220	17		43130		33	56	23	28	20	9		40102		17	84	83	195	160	22
40743		6.4	185	220	210	240	8		41512		24	22	76	64	29	26		11111		42	95	85	155	145	31
40176		3	32	96	74	32	3		Mean		25.6	37	40.6	52.4	39	13.2		Mean		43.8	96.4	86.2	165	147.6	32
Mean		12.5667	67.5	74.1667	113	101.667	10.1667		σ		11.7601	15.843	23.1149	26.397	13.7659	8.16701		σ		19.4216	15.0433	24.7326	36.2284	45.5115	8.86002
σ		9.16988	64.5066	75.98	75.8288	103.448	6.73548		S.E.M. (n=5)		5.25928	7.0852	10.3373	11.8051	6.1563	3.6524		S.E.M. (n=5)		8.68562	6.72756	11.0607	16.2019	20.3534	3.96232
S.E.M. (n=6)		3.74359	26.3347	31.0187	30.957	42.2324	2.74975		Ttest Tukey, vs 0	р=		0.320146	0.283546	0.172698	0.218567	0.0850809		Ttest Tukey, vs 0	р=		0.0387625	0.152345	0.0185289	0.0323986	0.193086
Ttest Tukey, vs 0	р=		0.0993838	0.121567	0.0222314	0.0887377	0.261652														#		#	#
					#				Ttest Tukey, vs basal period	р=	0.373	0.739	0.39	0.519	0.932	0.812		Ttest Tukey, vs basal period	р=	0.381504	0.279202	0.29117	0.820331	0.713603	0.195797
Ttest Tukey, vs basal period	р=	0.373	0.739	0.39	0.519	0.932	0.812

## Sheet: CORTISOL
Figure 3B								Figure 3D									Figure 3F
Cortisol (nmol/l), stress, control, basal period								Cortisol (nmol/l), test with CRH, control, basal period									Cortisol (nmol/l), test with AVP, control, basal period
YOUNG								YOUNG									YOUNG
TIME(MIN)		0'	30'	60'	120'	240'		TIME(MIN)		0'	15'	30'	60'	120'	240'		TIME(MIN)		0'	15'	30'	60'	120'	240'
41818		205	800	1000	1050	800		43043		330	700	800	960	960	700		40743		380	760	960	980	1100	1000
40102		220	900	940	1050	900		42259		560	800	800	940	1050	800		40102		360	840	960	1000	1100	1000
40775		540	800	940	860	500		41512		680	740	800	920	920	740		41007		840	900	840	1100	1000	840
40757		320	760	940	1050	760		43130		545	800	840	1000	920	660		39444		840	840	840	1000	1100	840
40743		380	760	900	1150	760		42234		320	620	620	545	500	480		40757		500	840	840	840	900	700
40176		800	1000	940	1050	800		Mean		487	732	772	873	870	676		Mean		584	836	888	984	1040	876
Mean		410.833	836.667	943.333	1035	753.333		σ		156.908	75.6307	86.7179	185.728	213.542	121.161		σ		239.75	49.7996	65.7267	93.1665	89.4427	126.807
σ		226.328	95.0088	32.0416	94.6044	134.263		S.E.M. (n=5)		70.1712	33.8231	38.7814	83.0602	95.4987	54.1849		S.E.M. (n=5)		107.219	22.2711	29.3939	41.6653	40	56.7098
S.E.M. (n=6)		92.3978	38.7872	13.0809	38.6221	54.8128		Ttest Tukey, vs 0	р=		0.00890977	0.00725129	0.00666082	0.00947623	0.0248962		Ttest Tukey, vs 0	р=		0.0550754	0.0830955	0.0133142	0.0181904	0.110289
Ttest Tukey, vs 0	р=		0.00252579	0.00276349	0.00226842	0.0384572					##	##	##	##	#							#	#
			##	##	##	#
Figure 3B								Figure 3D									Figure 3F
Cortisol (nmol/l), stress, control, standard light								Cortisol (nmol/l), test with CRH, control, standard light									Cortisol (nmol/l), test with AVP, control, standard light
YOUNG								YOUNG									YOUNG
TIME(MIN)		0'	30'	60'	120'	240'		TIME(MIN)		0'	15'	30'	60'	120'	240'		TIME(MIN)		0'	15'	30'	60'	120'	240'
41818		500	780	900	900	800		43043		780	940	900	1000	1000	600		40743		580	840	900	940	1100	1000
40102		540	840	1000	1100	800		42259		680	680	680	820	820	680		40102		580	840	960	1000	1100	1100
40775		240	640	780	900	780		41512		820	820	820	820	1005	680		41007		640	800	940	940	1000	1000
40757		210	600	840	1000	900		43130		820	1005	1005	1005	820	480		39444		840	840	940	1000	1100	840
40743		540	600	760	900	750		42234		310	680	680	680	820	480		40757		520	740	800	840	840	800
40176		540	780	900	900	840		Mean		682	825	817	865	893	584		Mean		632	812	908	944	1028	948
Mean		428.333	706.667	863.333	950	811.667		σ		215.685	148.071	141.227	137.931	99.975	100.399		σ		123.774	43.8178	64.1872	65.4217	113.666	124.579
σ		158.545	105.578	88.9194	83.666	52.3132		S.E.M. (n=5)		96.4572	66.2193	63.1585	61.6847	44.7102	44.8999		S.E.M. (n=5)		55.3534	19.5959	28.7054	29.2575	50.8331	55.7136
S.E.M. (n=6)		64.7259	43.1019	36.3012	34.1565	21.3568		Ttest Tukey, vs 0	р=		0.105955	0.12086	0.0377763	0.0650472	0.318886		Ttest Tukey, vs 0	р=		0.0207401	0.0042247	0.00194501	0.00172327	0.0230951
Ttest Tukey, vs 0	р=		0.00271928	0.000694657	0.000831233	0.00417476							#							#	##	##	##	#
			##	###	###	##		Ttest Tukey, vs basal period	р=	0.140732	0.246377	0.560574	0.940264	0.832797	0.227409		Ttest Tukey, vs basal period	р=	0.121713	0.437208	0.783567	0.308439	0.729434	0.344041
Ttest Tukey, vs basal period	р=	0.87981	0.0488406	0.0649252	0.130247	0.344772
