# Supplementary material for: Age-related and individual features of the HPA axis stress responsiveness under constant light in nonhuman primates
Source: Front Endocrinol (Lausanne). 2023 Jan 9;13:1051882. doi: 10.3389/fendo.2022.1051882 (PMC9870316; doi:10.3389/fendo.2022.1051882)
Supplement: Supplementary file 6 [file Table_6.xls]

## Sheet: Stress
Figure 5A
ACTH, pg/ml (acute stress), basal period
OLD
Time (min)		0'	15'	30'	60'	120'	240'
31970		15	14	82	35	27	8
2438		6.4	14	110	10	1	10
32479		23	250	60	40	48	8
26148		40	45	40	54	35	11
30858		66	150	14	90	74	27
31868		25	145	80	60	105	12
31960		10.5	50	20	18	22	6.4
Mean		26.5571	95.4286	58	43.8571	44.5714	11.7714
σ		20.6124	88.6902	35.2893	27.0828	34.9707	6.98802
S.E.M. (n=7)		7.79077	33.5217	13.3381	10.2363	13.2177	2.64122
Ttest Tukey vs 0 min	р=		0.0707874	0.152684	0.00475217	0.154827	0.0378715
					##		#
Figure 5A
ACTH, pg/ml (acute stress), constant light
OLD
Time (min)		0'	15'	30'	60'	120'	240'
31970		8.4	5	12	38	20	11
2438		5	8.4	12	33	17	7
32479		20	60	105	70	20	8
26148		7	36	90	70	38	11
30858		80	130	66	105	80	30
31868		33	70	60	105	56	12
31960		5	12	12	8.4	28	6
Mean		22.6286	45.9143	51	61.3429	37	12.1429
σ		27.3075	45.0531	39.3827	36.7717	23.3452	8.19407
S.E.M. (n=7)		10.3213	17.0285	14.8853	13.8984	8.82367	3.09707
Ttest Tukey vs 0 min	р=		0.0250466	0.108413	0.00528322	0.0137727	0.0390244
			#		##	#	#
Ttest vs BEFORE	р=	0.766485	0.548274	0.266152	0.577976	0.383502	0.487622

## Sheet: CRH
Figure 5C
ACTH, pg/ml (CRH test), basal period
OLD
Time (min)	0'	15'	30'	60'	120'	240'
34347	28	42	50	80	18	3
31970	9	18	23	28	14	8
31960	12	20	28	30	14	3
26148	15	35	36	38	16	8
2438	4	14	16	13	13	9
Mean	13.6	25.8	30.6	37.8	15	6.2
σ	9.01665	12.0499	13.069	25.2626	2	2.94958
S.E.M. (n=5)	4.03237	5.38888	5.84466	11.2978	0.894427	1.31909
Т-тест,Tukey vs 0		0.00517208	0.000952315	0.0297289	0.681737	0.215645
		##	##	#
Figure 5C
ACTH, pg/ml (CRH test), constant light
OLD
Time (min)	0'	15'	30'	60'	120'	240'
34347	40	68	100	26	31	18
31970	16	28	31	18	22	21
31960	18	52	24	47	80	33
26148	6	15	21	18	13	15
2438	17	26	47	73	38	17
Mean	19.4	37.8	44.6	36.4	36.8	20.8
σ	12.482	21.6148	32.5622	23.6495	25.9172	7.15542
S.E.M. (n=5)	5.58211	9.66644	14.5623	10.5764	11.5905	3.2
Т-тест,Tukey vs 0		0.0249282	0.0570783	0.229266	0.224396	0.836175
		#	#
Ttest vs BASAL PERIOD	0.424	0.31	0.399	0.93	0.098	0.003
						●

## Sheet: AVP
Figure 5E
ACTH, pg/ml (AVP test), basal period
OLD
Time (min)	0'	15'	30'	60'	120'	240'	S240
30858	38	74	120	120	55	38	19536
26148	23	62	110	170	70	23	20880
31868	49	66	128	160	41	27	20784
31889	13	23	28	14	18	7	4464
31960	28	18	35	32	14.5	6.4	5601.6
Mean	30.2	48.6	84.2	99.2	39.7	20.28	14253.1
σ	13.8456	26.073	48.5922	72.3132	23.7687	13.5607	8443.23
S.E.M. (n=5)	6.19193	11.6602	21.7311	32.3394	10.6297	6.06452	3775.93
Т-тест,Tukey vs 0		0.0369888	0.0305612	0.0711152	0.285108	0.270651
		#	#
Figure 5E
ACTH, pg/ml (AVP test), constant light
OLD
Time (min)	0'	15'	30'	60'	120'	240'	S240
30858	94	125	125	115	94	17	24696
26148	6	5	22	27	33	8	4512
31868	20	47	52	84	26	9	10728
31889	38	17	150	190	200	52	28896
31960	4	15	25	15	22	5	3912
Mean	32.4	41.8	74.8	86.2	75	18.2	14548.8
σ	37.0243	49.0836	59.0821	71.0331	75.7628	19.4088	11589.7
S.E.M. (n=5)	16.5578	21.9509	26.4223	31.767	33.8821	8.67986	5183.07
Т-тест,Tukey vs 0		0.37918	0.0742785	0.109282	0.231381	0.42998
Ttest vs BASAL PERIOD	0.904029	0.791338	0.790458	0.781573	0.349299	0.849166	0.964354
