# Supplementary material for: Age-related and individual features of the HPA axis stress responsiveness under constant light in nonhuman primates
Source: Front Endocrinol (Lausanne). 2023 Jan 9;13:1051882. doi: 10.3389/fendo.2022.1051882 (PMC9870316; doi:10.3389/fendo.2022.1051882)
Supplement: Supplementary file 7 [file Table_7.xls]

## Sheet: Stress
Figure 5B
Cortisol (nmol/l) (acute stress), basal period
OLD
Time (min)		0'	30'	60'	120'	240'
31970		490	780	960	640	390
2438		490	780	960	960	960
34347		780	960	960	1100	780
32479		560	780	960	900	490
26148		780	960	1000	960	500
31960		645	780	780	700	560
30858		640	780	960	780	640
31868		640	785	780	960	640
Mean		628.125	825.625	920	875	620
σ		113.072	82.956	87.5051	154.827	181.187
S.E.M. (n=8)		39.977	29.3294	30.9377	54.7396	64.0591
Ttest Tukey vs 0 min	р=		4.93196e-05	0.000656367	0.0014003	0.917536
			###	###	##
Figure 5B
Cortisol (nmol/l) (acute stress), constant light
OLD
Time (min)		0'	30'	60'	120'	240'
31970		360	560	660	560	450
2438		300	700	800	780	800
34347		540	720	800	960	960
32479		430	700	780	800	580
26148		300	600	600	560	560
31960		470	720	800	780	800
30858		470	700	780	800	480
31868		300	600	600	560	560
Mean		396.25	662.5	727.5	725	648.75
σ		93.951	64.5313	91.3001	148.42	181.693
S.E.M. (n=8)		33.2167	22.8153	32.2795	52.4745	64.2383
Ttest Tukey vs 0 min	р=		1.23005e-05	4.03893e-06	1.99874e-05	0.00347237
			###	###	###	##
Ttest vs BEFORE	р=	0.000537726	0.000616584	0.000725932	0.0679374	0.755989
		●●	●●	●●

## Sheet: CRH
Figure 5D
Cortisol (nmol/l) (CRH test), basal period
OLD
Time (min)	0'	15'	30'	60'	120'	240'
34347	500	700	860	860	800	560
31970	600	800	740	780	600	620
31960	620	780	740	780	620	540
26148	330	900	840	1050	720	600
2438	450	720	740	780	720	560
Mean	500	780	784	850	692	576
σ	118.11	78.7401	60.663	117.047	81.9756	32.8634
S.E.M. (n=5)	52.8205	35.2136	27.1293	52.345	36.6606	14.6969
Т-тест,Tukey vs 0		0.0199173	0.0171237	0.0253707	0.076382	0.257973
		#	#	#
Figure 5D
Cortisol (nmol/l) (CRH test), constant light
OLD
Time (min)	0'	15'	30'	60'	120'	240'
34347	540	540	860	780	840	600
31970	500	600	720	740	640	560
31960	310	540	720	780	820	560
26148	540	740	780	900	820	640
2438	700	640	700	1000	720	720
Mean	518	612	756	840	768	616
σ	139.356	83.1865	65.4217	107.703	85.557	66.9328
S.E.M. (n=5)	62.3217	37.2022	29.2575	48.1664	38.2623	29.9333
Т-тест,Tukey vs 0		0.167477	0.025238	0.00172696	0.0387161	0.0706776
			#	##	#
Ttest vs BASAL PERIOD	0.831131	0.0111937	0.502732	0.891677	0.189419	0.264643
		●

## Sheet: AVP
Figure 5F
Cortisol (nmol/l) (AVP test), basal period
OLD
Time (min)	0'	15'	30'	60'	120'	240'
30858	680	840	960	840	1100	1000
26148	680	800	980	1000	1100	960
31868	520	760	840	960	1000	840
31889	630	960	1100	1000	980	800
31960	840	1000	900	1000	840	630
Mean	670	872	956	960	1004	846
σ	115.326	103.537	97.3653	69.282	107.145	146.219
S.E.M. (n=5)	51.5752	46.3033	43.5431	30.9839	47.9166	65.3911
Т-тест,Tukey vs 0		0.00572652	0.012125	0.00677898	0.017785	0.154254
		##	#	##	#
Figure 5F
Cortisol (nmol/l) (AVP test), constant light
OLD
Time (min)	0'	15'	30'	60'	120'	240'
30858	560	840	900	840	1000	900
26148	390	800	900	960	900	800
31868	430	720	840	900	840	560
31889	620	900	960	1100	1150	1100
31960	640	800	840	840	800	700
Mean	528	812	888	928	938	812
σ	112.561	65.7267	50.1996	108.259	140.428	204.255
S.E.M. (n=5)	50.3389	29.3939	22.4499	48.4149	62.8013	91.3455
Т-тест,Tukey vs 0		0.00199636	0.00207715	0.00435057	0.00346639	0.0247874
		##	##	##	##	#
Ttest vs BASAL PERIOD	0.0843016	0.305803	0.202555	0.592952	0.427677	0.769872
