# Supplementary material for: Age-related and individual features of the HPA axis stress responsiveness under constant light in nonhuman primates
Source: Front Endocrinol (Lausanne). 2023 Jan 9;13:1051882. doi: 10.3389/fendo.2022.1051882 (PMC9870316; doi:10.3389/fendo.2022.1051882)
Supplement: Supplementary file 8 [file Table_8.xls]

## Sheet: ACTH
Figure 6A					Figure 6A					Figure 6A
S240 ACTH (pg/ml×min) STRESS (ASE)					S240 ACTH (pg/ml×min), test with CRH					S240 ACTH (pg/ml×min), test with AVP
OLD		Basal period	Constant light		OLD		Basal period	Constant light		OLD		Basal period	Constant light
31970		8136	4065.6		34347		9864	12192		30858		19536	24696
2438		6873.6	3667.2		31970		4392	5640		26148		20880	4512
32479		19848	12912		31960		4776	10968		31868		20784	10728
26148		9576	11664		26148		6552	3720		31889		4464	28896
30858		17976	18288		2438		3000	9648		31960		5601.6	3912
31868		19608	15048		Mean		5716.8	8433.6		Mean		14253.1	14548.8
31960		5685.6	3163.2		σ		2641.88	3607.14		σ		8443.23	11589.7
Mean		12529	9829.71		S.E.M. (n=5)		1181.48	1613.16		S.E.M. (n=5)		3775.93	5183.07
σ		6326.98	6154.7		Ttest Tukey, vs Basal period	р=		0.211307		Ttest Tukey, vs Basal period	р=		0.964354
S.E.M. (n=7)		2391.37	2326.26
Ttest Tukey, vs Basal period	р=		0.487622
				×

## Sheet: CORT
Figure 6B					Figure 6B					Figure 6B
S240 CORTISOL (nmol/l×min) STRESS (ASE)					S240 CORTISOL (nmol/l×min), test with CRH					S240 CORTISOL (nmol/l×min), test with AVP
OLD		Basal period	Constant light		OLD		Basal period	Constant light		OLD		Basal period	Constant light
31970		169200	131100		34347		180000	172320		30858	30858	219840	206880
2438		205500	169800		31970		169440	155040		26148	26148	225600	199440
34347		228000	193800		31960		168000	158160		31868	31868	203520	182160
32479		189900	167100		26148		190800	183840		31889	31889	228240	238560
26148		213600	131400		2438		166320	180960		31960	31960	214800	189600
31960		171750	176100		Mean		174912	170064		Mean		218400	203328
30858		189600	165300		σ		10366.5	13048.1		σ		9812.16	21826.4
31868		189900	131400		S.E.M. (n=5)		4636.04	5835.31		S.E.M. (n=5)		4388.13	9761.07
Mean		194681	158250		Ttest Tukey, vs Basal period	р=		0.533603		Ttest Tukey, vs Basal period	р=		0.197
σ		20113.2	23972.7
S.E.M. (n=8)		7111.08	8475.62
Ttest Tukey, vs Basal period	р=		0.00533727
			●●
