# Supplementary material for: Age-related and individual features of the HPA axis stress responsiveness under constant light in nonhuman primates
Source: Front Endocrinol (Lausanne). 2023 Jan 9;13:1051882. doi: 10.3389/fendo.2022.1051882 (PMC9870316; doi:10.3389/fendo.2022.1051882)
Supplement: Supplementary file 9 [file Table_9.xls]

## Sheet: ACTH
Figure 7A									Figure 7C
ACTH (pg/ml), test with CRH, basal period									ACTH (pg/ml), test with AVP, basal period
OLD									OLD
Time(min)		0'	15'	30'	60'	120'	240'		Time(min)		0'	15'	30'	60'	120'	240'
35241		3.5	76	70	75	22	4		3913	3913	14	40	42	22	7	23
35721		27	66	62	62	33	3		2438	2438	20	32	17	18	6.4	6.4
35100		30	22	29	30	6.5	4		31970	31970	20	32	33	28	14	14
Mean		20.1667	54.6667	53.6667	55.6667	20.5	3.66667		Mean		18	34.6667	30.6667	22.6667	9.13333	14.4667
σ		14.5115	28.7286	21.7332	23.1589	13.3135	0.57735		σ		3.4641	4.6188	12.6623	5.03322	4.22532	8.30983
S.E.M. (n=3)		8.37821	16.5865	12.5477	13.3708	7.68657	0.333333		S.E.M. (n=3)		2	2.66667	7.31057	2.90593	2.43949	4.79768
Ttest Tukey, vs 0	р=		0.277543	0.227945	0.227607	0.981073	0.192395		Ttest Tukey, vs 0	р=		0.07024	0.292648	0.296474	0.065302	0.647815
Figure 7A									Figure 7C
ACTH (pg/ml), test with CRH, standard light									ACTH (pg/ml), test with AVP, standard light
OLD									OLD
Time(min)		0'	15'	30'	60'	120'	240'		Time(min)		0'	15'	30'	60'	120'	240'
35241		38	22	25	90	18	8		3913	3913	12	38	31	25	12	22
35721		52	140	27	80	66	9.8		2438	2438	10	22	30	24	17	17
35100		9.8	50	36	30	18	3.5		31970	31970	22	45	28	22	17	8
Mean		33.2667	70.6667	29.3333	66.6667	34	7.1		Mean		14.6667	35	29.6667	23.6667	15.3333	15.6667
σ		21.4945	61.655	5.85947	32.1455	27.7128	3.245		σ		6.4291	11.7898	1.52753	1.52753	2.88675	7.0946
S.E.M. (n=3)		12.4099	35.5965	3.38296	18.5592	16	1.8735		S.E.M. (n=3)		3.71184	6.80686	0.881917	0.881917	1.66667	4.09607
Ttest Tukey, vs 0	р=		0.339407	0.822938	0.07318	0.95068	0.131075		Ttest Tukey, vs 0	р=		0.0411223	0.0797142	0.184063	0.865769	0.90675
												#
Ttest Tukey, vs basal period	р=	0.431021	0.704558	0.134456	0.655713	0.489296	0.145518		Ttest Tukey, vs basal period	р=	0.473427	0.965818	0.898537	0.758455	0.103827	0.858398

## Sheet: CORTISOL
Figure 7B									Figure 7D
Cortisol (nmol/l), test with CRH, basal period									Cortisol (nmol/l), test with AVP, basal period
OLD									OLD
Time(min)		0'	15'	30'	60'	120'	240'		Time(min)		0'	15'	30'	60'	120'	240'
35721		680	680	780	920	1000	920		31970	31970	630	842	960	960	841	720
35100		700	820	820	840	640	740		3913	3913	760	840	1000	1100	840	1100
35241		620	740	920	920	840	600		2438	2438	740	841	1000	1100	842	630
Mean		666.667	746.667	840	893.333	826.667	753.333		Mean		710	841	986.667	1053.33	841	816.667
σ		41.6333	70.2377	72.111	46.188	180.37	160.416		σ		70	1	23.094	80.829	1	249.466
S.E.M. (n=3)		24.037	40.5518	41.6333	26.6667	104.137	92.6163		S.E.M. (n=3)		40.4145	0.57735	13.3333	46.6667	0.57735	144.029
Ttest Tukey, vs 0	р=		0.183503	0.112375	0.0398698	0.294727	0.385121		Ttest Tukey, vs 0	р=		0.0853909	0.00958603	0.000659165	0.0837518	0.498652
					#								##	###
Figure 7B									Figure 7D
Cortisol (nmol/l), test with CRH, standard light									Cortisol (nmol/l), test with AVP, standard light
OLD									OLD
Time(min)		0'	15'	30'	60'	120'	240'		Time(min)		0'	15'	30'	60'	120'	240'
35721		500	680	820	815	820	680		31970	31970	640	842	940	940	840	740
35100		680	820	825	825	680	500		3913	3913	520	840	940	940	740	800
35241		500	820	823	820	820	480		2438	2438	740	840	1000	1000	1100	1100
Mean		560	773.333	822.667	820	773.333	553.333		Mean		633.333	840.667	960	960	893.333	880
σ		103.923	80.829	2.51661	5	80.829	110.151		σ		110.151	1.1547	34.641	34.641	185.831	192.873
S.E.M. (n=3)		60	46.6667	1.45297	2.88675	46.6667	63.5959		S.E.M. (n=3)		63.5959	0.666667	20	20	107.29	111.355
Ttest Tukey, vs 0	р=		0.0596366	0.0466934	0.0456172	0.183503	0.954778		Ttest Tukey, vs 0	р=		0.082524	0.0209785	0.0209785	0.0354922	0.0849542
				#	#								#	#	#
Ttest Tukey, vs basal period	р=	0.174232	0.688457	0.698706	0.0522258	0.664563	0.149654		Ttest Tukey, vs basal period	р=	0.36647	0.724659	0.32946	0.139876	0.651242	0.745467
