# Supplementary material for: Age-related and individual features of the HPA axis stress responsiveness under constant light in nonhuman primates
Source: Front Endocrinol (Lausanne). 2023 Jan 9;13:1051882. doi: 10.3389/fendo.2022.1051882 (PMC9870316; doi:10.3389/fendo.2022.1051882)
Supplement: Supplementary file 10 [file Table_10.xls]

## Sheet: ACTH
Figure 8A					Figure 8A
S240 ACTH (pg/ml×min), test with CRH					S240 ACTH (pg/ml×min), test with AVP
OLD		Basal period	Standard light		OLD		Basal period	Standard light
34347		9864	12192		30858		19536	24696
31970		4392	5640		26148		20880	4512
31960		4776	10968		31868		20784	10728
26148		6552	3720		31889		4464	28896
2438		3000	9648		31960		5601.6	3912
Mean		5716.8	8433.6		Mean		14253.1	14548.8
σ		2641.88	3607.14		σ		8443.23	11589.7
S.E.M. (n=5)		1181.48	1613.16		S.E.M. (n=5)		3775.93	5183.07
Ttest Tukey, vs Basal period	р=		0.211307		Ttest Tukey, vs Basal period	р=		0.964354

## Sheet: CORT
Figure 8B					Figure 8B
S240 Cortiosl (nmol/l×min), test with CRH					S240 Cortiosl (nmol/l×min), test with AVP
OLD		Basal period	Standard light		OLD		Basal period	Standard light
34347		180000	172320		30858	30858	219840	206880
31970		169440	155040		26148	26148	225600	199440
31960		168000	158160		31868	31868	203520	182160
26148		190800	183840		31889	31889	228240	238560
2438		166320	180960		31960	31960	214800	189600
Mean		174912	170064		Mean		218400	203328
σ		10366.5	13048.1		σ		9812.16	21826.4
S.E.M. (n=5)		4636.04	5835.31		S.E.M. (n=5)		4388.13	9761.07
Ttest Tukey, vs Basal period	р=		0.533603		Ttest Tukey, vs Basal period	р=		0.197
