# Supplementary material for: Age-related and individual features of the HPA axis stress responsiveness under constant light in nonhuman primates
Source: Front Endocrinol (Lausanne). 2023 Jan 9;13:1051882. doi: 10.3389/fendo.2022.1051882 (PMC9870316; doi:10.3389/fendo.2022.1051882)
Supplement: Supplementary file 11 [file Table_11.xls]

## Sheet: ACTH SB
Table 1
ACTH (pg/ml), stress, young animals with SB, basal period
YOUNG
Time (min)		0'	15'	30'	60'	120'	240'	S120	S240
41818		23	100	180	74	25	6.5	11340	18900
40757		18	115	90	30	34	6.5	7830	13500
40775		13	50	62	54	56	3	6015	11040
Mean		18	88.3333	110.667	52.6667	38.3333	5.33333	8395	14480
σ		5	34.0343	61.655	22.0303	15.9478	2.02073	2707.09	4020.6
S.E.M. (n=3)		2.88675	19.6497	35.5965	12.7192	9.20748	1.16667	1562.94	2321.29
Ttest Tukey vs 0 min	р=		0.057519	0.106022	0.0974589	0.233114	0.0232298
							#
Table 1
ACTH (pg/ml), stress, young animals with SB, constant light
YOUNG
Time (min)		0'	15'	30'	60'	120'	240'	S120	S240
41818		12	54	66	60	7	6	5685	9408
40757		2	20	30	45	33	6	3375	6336
40775		2	11	22	12	34	3	1890	3912
Mean		5.33333	28.3333	39.3333	39	24.6667	5	3650	6552
σ		5.7735	22.6789	23.4379	24.5561	15.308	1.73205	1912.39	2754.36
S.E.M. (n=3)		3.33333	13.0937	13.5319	14.1774	8.83805	1	1104.12	1590.23
Ttest Tukey vs 0 min	р=		0.144621	0.080297	0.105844	0.253088	0.920695
Ttest Tukey vs Basal Period	р=	0.0453529	0.063912	0.134339	0.512717	0.344562	0.838878	0.0682386	0.0479457
		●							●

## Sheet: ACTH DAB
Table 1
ACTH (pg/ml), stress, young animals with DAB, basal period
Young
Time (min)		0'	15'	30'	60'	120'	240'	S240
40743		35	68	108	170	140	10	24408
40102		35	130	174	190	140	60	32712
41007		66	150	150	100	94	30	26016
40176		32	40	96	140	105	10	19296
38787		90	120	156	104	75	6.4	24153.6
Mean		51.6	101.6	136.8	140.8	110.8	23.28	25317.1
σ		25.5793	45.8563	33.2445	39.6636	28.735	22.5342	4837.53
S.E.M. (n=5)		11.4394	20.5076	14.8674	17.7381	12.8507	10.0776	2163.41
Ttest Tukey vs 0 min	р=		0.0407775	0.00358738	0.0327152	0.063984	0.177628
			#	##	#
Table 1
ACTH (pg/ml), stress, young animals with DAB, constant light
Young
Time (min)		0'	15'	30'	60'	120'	240'	S240
40743		8.4	45	58	82	40	17	11409.6
40102		2	8	33	60	20	20	6336
41007		12	56	68	105	60	7	14328
40176		25	34	38	145	56	10	13944
38787		70	80	66	94	94	6	17856
Mean		23.48	44.6	52.6	97.2	54	12	12774.7
σ		27.3268	26.6233	16.1493	31.5071	27.3496	6.20484	4269.66
S.E.M. (n=5)		12.2209	11.9063	7.22219	14.0904	12.2311	2.77489	1909.45
Ttest Tukey vs 0 min	р=		0.0564811	0.0598349	0.0103578	0.00372878	0.466838
					#	##
Ttest Tukey vs Basal Period	р=	0.131496	0.0429271	0.000936594	0.0904644	0.0125813	0.31198	0.00245635
			●	●●		●		●

## Sheet: CORT DAB
Table 1
Cortisol (nmol/l), stress, young animals with DAB, basal period
YOUNG
TIME(MIN)		0'	30'	60'	120'	240'	S240
40743		490	780	960	960	960	205500
40102		640	780	1000	960	960	212400
41007		780	960	960	1100	900	231600
40176		640	780	960	960	900	208200
40151		960	960	960	1100	780	234400
38787		780	960	960	960	780	219600
Mean		715	870	966.667	1006.67	880	218617
σ		161.462	98.5901	16.3299	72.2957	81.9756	12147.8
S.E.M. (n=6,5)		65.9166	40.2492	6.66667	29.5146	33.4664	4959.33
Ttest vs 0	р=		0.00982918	0.0137849	0.00177644	0.145047
			##	#	##
Cortisol (nmol/l), stress, young animals with DAB, constant light
YOUNG
TIME(MIN)		0'	30'	60'	120'	240'	S240
40743		185	800	960	1100	240	184350
40102		270	720	960	960	720	188100
41007		540	800	960	1050	700	205800
40176		540	780	960	1050	800	207600
38787		640	720	780	800	640	176400
Mean		435	764	924	992	620	192450
σ		196.087	40.9878	80.4984	118.617	220	13692
S.E.M. (n=5)		87.6926	18.3303	36	53.0471	98.387	6123.23
Ttest vs 0	р=		0.0236536	0.0122214	0.0109116	0.0814827
			#	#	#
Ttest vs BEFORE	р=	0.0286265	0.0524562	0.232399	0.805866	0.0242967	0.00837547
		●				●	●
