# Supplementary material for: Age-related and individual features of the HPA axis stress responsiveness under constant light in nonhuman primates
Source: Front Endocrinol (Lausanne). 2023 Jan 9;13:1051882. doi: 10.3389/fendo.2022.1051882 (PMC9870316; doi:10.3389/fendo.2022.1051882)
Supplement: Supplementary file 12 [file Table_12.xls]

## Sheet: Лист1
Table 2
ACTH (pg/ml), test with CRH, basal period
YOUNG
Time (min)	0'	15'	30'	60'	120'	240'	S240
41818	9	19	40	47	23	3	6480
40102	12	18	78	170	48	6	15504
40757	4	14	33	30	19	4	4800
40775	18	24	25	78	14	4	7296
40743	43	45	105	160	72	3	19440
40176	23	15	90	66	29	3	10224
Mean	8.33333	17	50.3333	82.3333	30	4.33333	10624
σ	4.04145	2.64575	24.2143	76.3959	15.7162	1.52753	5724.75
S.E.M. (n=3)	2.33333	1.52753	13.9801	44.1072	9.07377	0.881917	2337.12
Т-тест,Tukey vs 0		0.176263	0.00774391	0.0181962	0.0441308	0.0586627
			##	#	#
Table 2
ACTH (pg/ml), test with CRH, constant light
YOUNG
Time (min)	0'	15'	30'	60'	120'	240'	S240
41818	33	23	12	30	23	12	5304
40102	14	18	56	130	270	43	24120
40757	11	9	30	16	16	6.5	3828
40775	14	11	64	86	35	4	9840
40743	80	155	210	235	240	12	42528
40176	80	82	170	220	145	21	32040
Mean	38.6667	49.6667	90.3333	119.5	121.5	16.4167	19610
σ	32.9586	58.3152	80.3932	93.1617	113.984	14.2773	15806.7
S.E.M. (n=3)	13.4553	23.8071	32.8204	38.0331	46.5337	5.82869	6453.08
Т-тест,Tukey vs 0		0.434462	0.0625811	0.0332696	0.110237	0.192089	0.0288168
				#			#
Ttest vs BASAL PERIOD	0.190553	0.289179	0.441274	0.552712	0.0951469	0.0569048	0.21972
