# Supplementary material for: Age-related and individual features of the HPA axis stress responsiveness under constant light in nonhuman primates
Source: Front Endocrinol (Lausanne). 2023 Jan 9;13:1051882. doi: 10.3389/fendo.2022.1051882 (PMC9870316; doi:10.3389/fendo.2022.1051882)
Supplement: Supplementary file 13 [file Table_13.xls]

## Sheet: ACTH SB
Table 3
ACTH (pg/ml), stress, old animals with SB, basal period
OLD
Time (min)		0'	15'	30'	60'	120'	240'	S240
31970		15	14	82	35	27	8	8136
2438		6.4	14	110	10	11	10	7353.6
32479		23	25	60	40	48	8	9048
26148		40	45	40	54	35	11	9576
31960		10.5	50	20	18	22	6.4	5685.6
Mean		18.98	29.6	62.4	31.4	28.6	8.68	7959.84
σ		13.2666	17.0382	35.1966	17.5727	13.9032	1.81989	1530.26
S.E.M. (n=3)		5.93299	7.61971	15.7404	7.85875	6.21772	0.81388	684.353
Ttest Tukey vs 0 min	р=		0.222636	0.0848065	0.0147715	0.122372	0.136643
					#
Table 3
ACTH (pg/ml), stress, old animals with SB, constant light
OLD
Time (min)		0'	15'	30'	60'	120'	240'	S240
31970		8.4	15	12	38	20	11	4545.6
2438		5	8.4	12	33	17	7	3667.2
32479		20	60	105	70	20	8	12912
26148		7	36	90	70	38	11	11664
31960		5	12	12	8.4	28	6	3163.2
Mean		9.08	26.28	46.2	43.88	24.6	8.6	7190.4
σ		6.27152	21.6931	47.1296	26.3452	8.53229	2.30217	4700.43
S.E.M. (n=3)		2.80471	9.70146	21.077	11.782	3.81576	1.02956	2102.09
Ttest Tukey vs 0 min	р=		0.0779999	0.124629	0.0270796	0.0431551	0.87743
					#	#
Ttest Tukey vs Basal Period	р=	0.17	0.795	0.555	0.404	0.598	0.953	0.737
