# Supplementary material for: Age-related and individual features of the HPA axis stress responsiveness under constant light in nonhuman primates
Source: Front Endocrinol (Lausanne). 2023 Jan 9;13:1051882. doi: 10.3389/fendo.2022.1051882 (PMC9870316; doi:10.3389/fendo.2022.1051882)
Supplement: Supplementary file 14 [file Table_14.xls]

## Sheet: Cortisol
Figure 4A								Figure 4B
Cortisol, nmol/l (circadian rhythms), experimental,basal period								Cortisol, nmol/l (circadian rhythms), control, basal period
Young								Young
№№	9-00	15-00	22-00	Amplitude				№№	9-00	15-00	22-00	Amplitude
	0 h	6 h	13 h						0 h	6 h	13 h
41818(2020)	700	620	760	-60				40743	920	660	500	420
40757(2020)	480	155	360	120				40102	1100	540	560	540
40775(2020)	700	360	640	60				40757	920	450	620	300
40743(2020)	660	580	260	400				41007	1150	1100	920	230
40102(2020)	820	460	260	560				39444	1150	1150	920	230
40176(2020)	700	700	560	140				43043	740	840	205	535
41818(2021)	660	800	215	445				42259	700	800	440	260
40102(2021)	760	620	290	470				42234	780	360	270	510
40757(2021)	490	245	235	255				43130	760	920	360	400
40775(2021)	600	500	170	430				41512	640	820	500	140
40743(2021)	600	540	340	260				Mean	886	764	529.5	356.5
40176(2021)	700	600	410	290				σ	191.787	262.306	241.574	143.915
Mean	655.833	515	375	280.833				S.E.M. (n=10)	60.6483	82.9484	76.3924	45.5098
σ	100.132	185.705	184.945	188.038				Ttest Tukey, vs 0 h (9-00)		0.902303	0.00126382
S.E.M. (n=12)	28.9058	53.6084	53.3889	54.2819							###
Ttest Tukey, vs 0 h (9-00)	р=	0.00778714	0.00030678
		##	###
Figure 4A								Figure 4B
Cortisol, nmol/l (circadian rhythms), constant light								Cortisol, nmol/l (circadian rhythms), control, standard light
Young								Young
№№	9-00	15-00	22-00	Amplitude				№№	9-00	15-00	22-00	Amplitude
	0 h	6 h	13 h						0 h	6 h	13 h
41818(2020)	580	580	660	-80				40743	560	500	270	290
40757(2020)	360	66	220	140				40102	920	500	540	380
40775(2020)	470	150	400	70				40757	740	540	620	120
40743(2020)	760	190	520	240				41007	1100	740	840	260
40102(2020)	900	225	540	360				39444	1150	920	840	310
40176(2020)	620	540	640	-20				43043	700	410	520	180
41818(2021)	600	370	700	-100				42259	860	700	700	160
40102(2021)	700	230	600	100				42234	700	860	860	-160
40757(2021)	700	410	520	180				43130	600	310	520	80
40775(2021)	600	310	520	80				41512	860	700	700	160
40743(2021)	600	270	600	0				Mean	819	618	641	178
40176(2021)	700	800	600	100				σ	197.678	197.248	186.097	151.056
Mean	632.5	345.083	543.333	89.1667				S.E.M. (n=10)	62.5113	62.3752	58.8491	47.768
σ	137.585	208.782	129.287	132.078				Ttest Tukey, vs 0 h (9-00)		0.0257747	0.0493944
S.E.M. (n=12)	39.7173	60.2703	37.322	38.1277							###
Ttest Tukey, vs 0 h (9-00)		0.000944494	0.0392671					Ttest Tukey, vs Basal period	0.451718	0.176528	0.262691	0.0144814
		###	#									●
Ttest Tukey, vs Basal period	0.639466	0.0467918	0.0169289	0.00850981
		●	●	●●

## Sheet: Melatonin
Figure 4C								Figure 4D
Melatonin, pg/ml (circadian rhythms),experimental, basal period								Melatonin, pg/ml (circadian rhythms), control, basal period
Young								Young
№№	9-00	15-00	22-00	Amplitude				№№	9-00	15-00	22-00	Amplitude
	0 h	6 h	13 h						0 h	6 h	13 h
40102(2020)	17	21	41	24				42259	30	29	72	42
41818(2020)	22.5	20	43	20.5				43043	25	22.5	70	45
40743(2020)	23	31	64	41				41512	22	27	54	32
40775(2020)	30	33	56	26				43130	14.5	15.5	94	79.5
40757(2020)	41	46	54	13				42234	15.5	20	60	44.5
40176(2020)	23.5	31	62	38.5				40743	9		37	28
40102(2021)	14	23	31	17				40102	10.5		39	28.5
41818(2021)	13	24	60	47				40757	35		38	3
40743(2021)	13	17.5	54	41				39444	9		46	37
40775(2021)	35	23	58	23				41007	13		58	45
40757(2021)	17.5	31	62	44.5				Mean	18.35	22.8	56.8	38.45
40176(2021)	24	50	98	74				σ	9.18044	5.41526	18.2196	19.2317
Mean	22.7917	29.2083	56.9167	34.125				S.E.M. (n=10,5)	1.87395	1.10538	3.71907	3.92565
σ	8.86889	10.1432	16.3399	17.0416				Ttest Tukey, vs 0 h (9-00)		0.397211	0.000137295
S.E.M. (n=12)	2.56023	2.92809	5.16713	5.38901							###
Ttest Tukey, vs 0 h (9-00)	р=	0.0323599	2.46559e-05
		#	###
Figure 4C								Figure 4D
Melatonin, pg/ml (circadian rhythms), constant light								Melatonin, pg/ml (circadian rhythms), control, standard light
Young								Young
№№	9-00	15-00	22-00	Amplitude				№№	9-00	15-00	22-00	Amplitude
	0 h	6 h	13 h						0 h	6 h	13 h
40102(2020)	22.5	29	36	13.5				42259	58	57	94	36
41818(2020)	20	8.6	43	23				43043	29	44	62	33
40743(2020)	15.5	31	50	34.5				41512	36	45	76	40
40775(2020)	25	40	48	23				43130	12	15.5	70	58
40757(2020)	22	34	38	16				42234	22.5	38	68	45.5
40176(2020)	48	52	70	22				40743	15		39	24
40102(2021)	7.4	25	50	42.6				40102	6		46	40
41818(2021)	15	24	62	47				40757	18		49	31
40743(2021)	14	12	56	42				39444	38		64	26
40775(2021)	12	27	82	70				41007	11		60	49
40757(2021)	10.5	14	47	36.5				Mean	24.55	39.9	62.8	38.25
40176(2021)	20	14	82	62				σ	15.8963	15.2823	15.9011	10.5548
Mean	19.325	25.8833	55.3333	36.0083				S.E.M. (n=10,5)	5.02684	6.83447	5.02836	3.33771
σ	10.4796	12.6584	15.6341	17.7746				Ttest Tukey, vs 0 h (9-00)		0.0592388	1.13868e-06
S.E.M. (n=12)	3.0252	3.65418	4.51317	5.13109							###
Ttest Tukey, vs 0 h (9-00)		0.0325028	2.21789e-05
		#	###
