# Supplementary material for: Age-related and individual features of the HPA axis stress responsiveness under constant light in nonhuman primates
Source: Front Endocrinol (Lausanne). 2023 Jan 9;13:1051882. doi: 10.3389/fendo.2022.1051882 (PMC9870316; doi:10.3389/fendo.2022.1051882)
Supplement: Supplementary file 15 [file Table_15.xls]

## Sheet: Cortisol
Figure 9A								Figure 9B
Cortisol (nmol/l), Circadian rhythms,experimental,basal period								Cortisol (nmol/l), Circadian rhythms, control, basal period
Old								Old CONTROL
№№	9-00	15-00	22-00	Amplitude				№№	9-00	15-00	22-00	Amplitude
	0 h	6 h	13 h						0 h	6 h	13 h
34347(2020)	600	760	360	240				35241	840	740	350	490
31970(2020)	600	700	540	60				35721	580	700	500	80
31960(2020)	700	600	520	180				35100	820	840	640	180
26048(2020)	860	700	520	340				31970	720	470	450	270
2438(2020)	600	860	520	80				2438	940	400	400	540
31970(2021)	480	540	330	150				Mean	780	630	468	312
2438(2021)	760	460	400	360				σ	136.382	186.815	111.221	197.914
34347(2021)	760	720	580	180				S.E.M. (n=5)	60.9918	83.5464	49.7393	88.5099
26148(2021)	700	600	450	250				Ttest Tukey, vs 0 h (9-00)		0.263549	0.0243394
31960(2021)	640	360	450	190							#
Mean	670	630	467	203
σ	108.423	148.847	82.8721	98.0986
S.E.M. (n=10)	34.2864	47.0697	26.2064	31.0215
Ttest Tukey, vs 0 h (9-00)		0.51027	0.000105922
			###
Figure 9A								Figure 9B
Cortisol (nmol/l), Circadian rhythms, experimental,constant light								Cortisol (nmol/l), Circadian rhythms, control, standard light
Old								Old CONTROL
№№	9-00	15-00	22-00	Amplitude				№№	9-00	15-00	22-00	Amplitude
	0 h	6 h	13 h						0 h	6 h	13 h
34347(2020)	700	600	600	100				35241	680	500	500	180
31970(2020)	700	520	520	180				35721	480	480	680
31960(2020)	600	410	410	190				35100	820	820	820
26048(2020)	700	520	860	-160				31970	540	500	340	200
2438(2020)	860	700	860	0				2438	660	500	290	370
31970(2021)	540	300	370	170				Mean	636	560	526	110
2438(2021)	520	240	320	200				σ	132.212	145.602	224.232	104.403
34347(2021)	700	200	580	120				S.E.M. (n=5)	59.127	65.1153	100.28	97
26148(2021)	680	370	380	300				Ttest Tukey, vs 0 h (9-00)		0.124495	0.320837
31960(2021)	600	145	280	320
Mean	660	400.5	518	142				Ttest Tukey, vs BASAL PERIOD	0.128488	0.527278	0.618377	0.162864
σ	98.8826	182.703	208.955	140.697
S.E.M. (n=10)	31.2694	57.7757	66.0774	44.4922
Ttest Tukey, vs 0 h (9-00)		0.000139345	0.0109788
		###	#
Ttest Tukey, vs BASAL PERIOD	0.831802	0.00646097	0.4823	0.275512
		●●

## Sheet: Melatonin
Figure 9C								Figure 9D
Melatonin, pg/ml (Circadian rhythms),experimental, basal period								Melatonin, pg/ml (Circadian rhythms), control, basal period
Old								Old
№№	9-00	15-00	22-00	Amplitude				№№	9-00	15-00	22-00	Amplitude
	0 h	6 h	13 h						0 h	6 h	13 h
34347	14.5	22	62	47.5				35241	19	31	130	111
31970	14	22	24	10				35721	37	19	140	103
31960	16	20	94	78				35100	21	35	90	69
26148	20	25	35	15				31970	21		48	27
2438	32	19	68	36				3913	5.2		44	38.8
34347	5.2	11.5	60	54.8				2438	9		64	55
31970	16.5	23	56	39.5				Mean	18.7	28.3333	86	67.3
31960	20.5	20.5	130	109.5				σ	11.1526	8.32666	41.3763	33.9844
26148	9.6	9.6	28	18.4				S.E.M. (n=6)	4.55302	4.8074	16.8918	13.8741
2438	34	15.5	98	64				Ttest Tukey, vs 0 h (9-00)		0.820756	0.00467068
Mean	18.23	18.81	65.5	47.27							##
σ	9.01	5.05249	33.7087	30.9207
S.E.M. (n=10)	2.84921	1.59774	10.6596	9.77799
Ttest Tukey, vs 0 h (9-00)		0.845339	0.000928308
			###
Figure 9C								Figure 9D
Melatonin, pg/ml (Circadian rhythms),experimental,constant light								Melatonin, pg/ml (Circadian rhythms), control, standard light
Old								Old
№№	9-00	15-00	22-00	Amplitude				№№	9-00	15-00	22-00	Amplitude
	0 h	6 h	13 h						0 h	6 h	13 h
34347	14	24	60	46				35241	86	68	120	34
31970	25	48	52	27				35721	32	23	50	18
31960	40	46	64	24				35100	29	52	74	45
26148	18	22	23	5				31970	21		84	63
2438	28	35	46	18				3913	9.6		76	66.4
34347	15.5	86	52	36.5				2438	32		66	34
31970	20	13	82	62				Mean	34.9333	47.6667	78.3333	43.4
31960	20.5	20	125	104.5				σ	26.4429	22.8108	23.4407	18.6419
26148	8.6	11.5	56	47.4				S.E.M. (n=6)	10.7953	13.1698	9.56963	7.61052
2438	20	31	90	70				Ttest Tukey, vs 0 h (9-00)		0.924434	0.00231486
Mean	20.96	33.65	65	44.04							##
σ	8.62969	22.2112	28.0555	29.0938				Ttest Tukey, vs BASAL period	0.186596	0.0373732	0.0568664	0.749642
S.E.M. (n=10)	2.72895	7.02379	8.87193	9.20027
Ttest Tukey, vs 0 h (9-00)		0.0984958	0.00099179
			###
Ttest Tukey, vs BASAL period	0.497787	0.0541382	0.971637	0.812599
